# Supplementary material for: Simulation of Air Puff Tonometry Test Using Arbitrary Lagrangian–Eulerian (ALE) Deforming Mesh for Corneal Material Characterisation
Source: MDPI journal article supplement (doi:10.3390/ijerph17010054), 2019-12-19
Supplement: s1 [file s1]

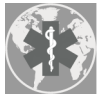

## Supplementary material

Manuscript ID: ijerph-612404

Title: Simulation of Air Puff Tonometry Test Using Arbitrary Lagrangian-Eulerian (ALE) Deforming Mesh for Corneal Material Characterisation

Authors: Osama Maklad \*, Ashkan Eliasy, Kai-Jung Chen, Vassilios Theofilis, Ahmed Elsheikh

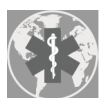

## Mesh independence study

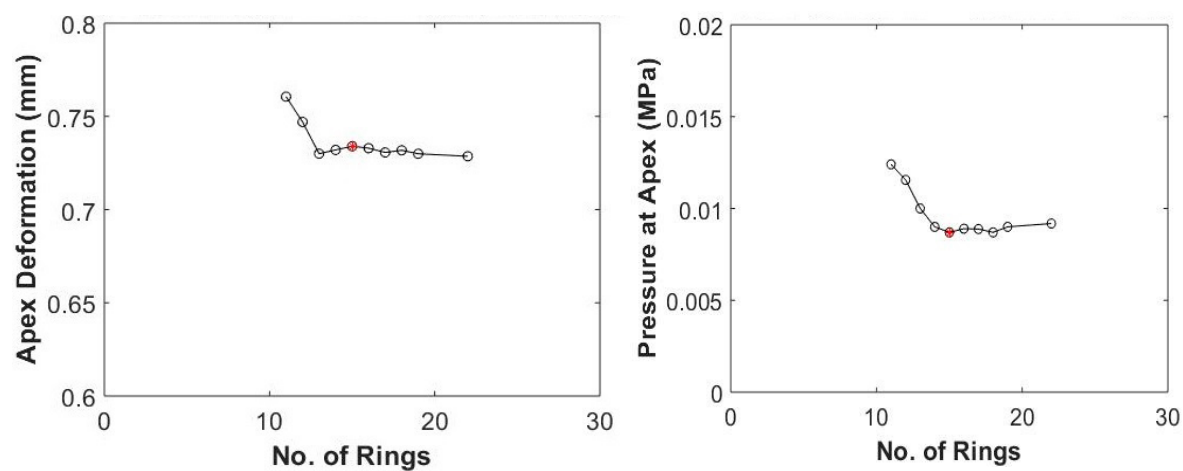

Figure S1. Mesh dependence study on both domains of the model, showing the apex deformation from the eye model and pressure on apex from the CFD model.



## CorVis-ST internal CFD model

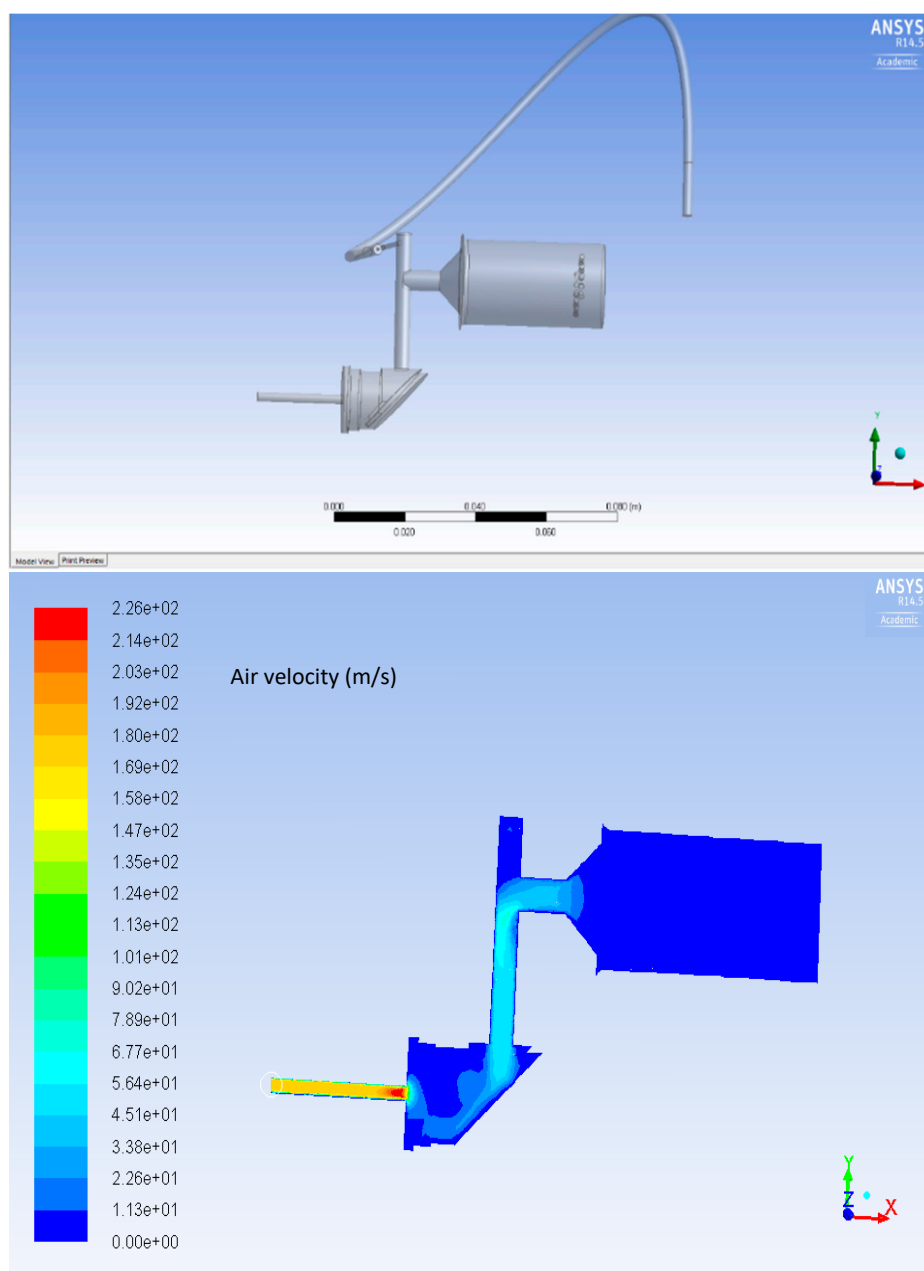

Figure S2. CorVis-ST CAD drawing as supplied from the manufacturer and a CFD solution of the air velocity inside the device starting from the piston at 2m/s ending at the nozzle at 168 m/s
